# Supplementary material for: An immunoinformatics approach to promiscuous peptide design for the Plasmodium falciparum erythrocyte membrane protein-1
Source: Royal Society of Chemistry journal article supplement (doi:10.1039/c7mb00332c), 2017-08-11
Supplement: c7mb00332c1.pdf [file c7mb00332c1.pdf]

## Supporting Information

### *An immunoinformatics approach to promiscuous peptides design for Plasmodium falciparum erythrocyte membrane protein-1*

Nazam Khan<sup>1†</sup>, Rajender Kumar<sup>2##</sup>, Shakti Chauhan<sup>1</sup>, Umar Farooq<sup>1</sup>

<sup>1</sup>Department of Applied Sciences and Biotechnology, Shoolini University of Biotechnology and Management Sciences, Solan, H.P., India

<sup>2</sup>Department of Pharmacoinformatics, National Institute of Pharmaceutical Education and Research (NIPER), Sector-67, S.A.S. Nagar-160062, Punjab, India

<sup>#2</sup>Present adresse : Architecture et Fonction des Macromolécules Biologiques, Aix-Marseille Université, Campus de Luminy, Case 932, Marseille, France

<sup>†</sup>These two authors contribute equally to the work

**Correspondence Author:**Dr. Umar Farooq

Professor,

Department of Applied Sciences and Biotechnology,

Shoolini University of Biotechnology and Management Sciences, Solan, H.P., India

**Corresponding Author Email:**[ufarooq8@gmail.com](mailto:ufarooq8@gmail.com)

Present address: Department of Dentistry, Taif University, Kingdom of Saudi Arabia

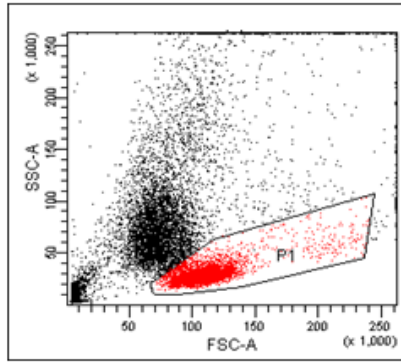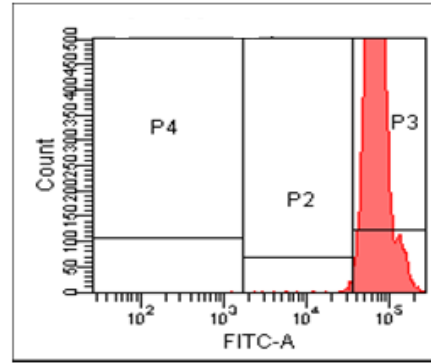

| Population | #Events | %Parent |
|------------|---------|---------|
| ■ P1       | 20,736  | 34.8    |
| ☒ P2       | 82      | 0.4     |
| ☒ P3       | 20,653  | 99.6    |
| ☒ P4       | 1       | 0.0     |

S1(a): Negative control without peptide

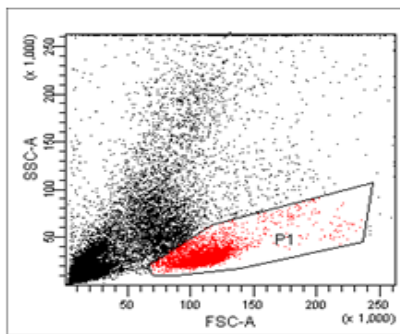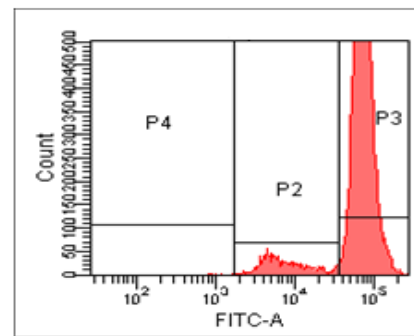

| Population | #Events | %Parent |
|------------|---------|---------|
| ■ P1       | 17,902  | 14.5    |
| ☒ P2       | 1,546   | 8.6     |
| ☒ P3       | 16,349  | 91.3    |
| ☒ P4       | 7       | 0.0     |

S1(b): 25 µg/ml Peptide Concentration

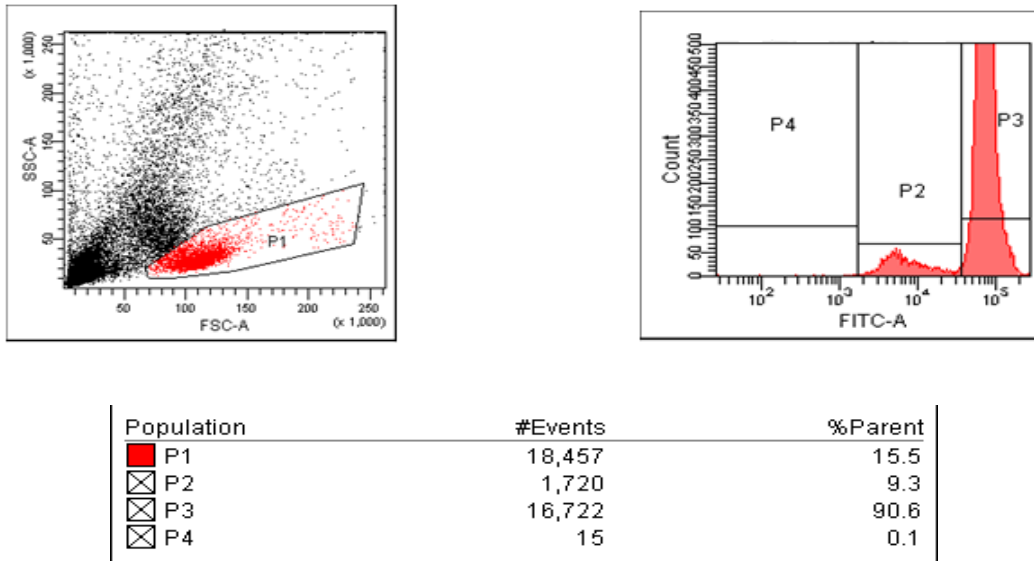

S1 (c): 50 µg/ml Peptide Concentration

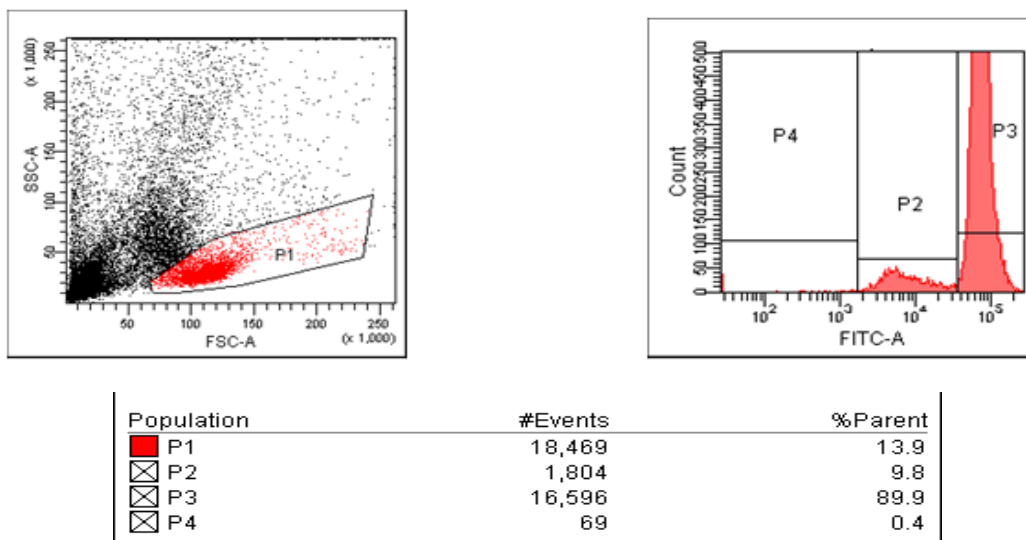

S1 (d): 100 µg/ml Peptide Concentration

**Fig. S1.** Flow cytometric results of proliferation assay carried out in one of *P. falciparum* exposed individuals. (a) Negative control without peptide (b) 25 µg/ml (Peptide Conc.) (c) 50 µg/ml (Peptide Conc.) (d) 100 µg/ml (Peptide Conc.). P3- Unstimulated cells. P2, P4- Stimulated cells.

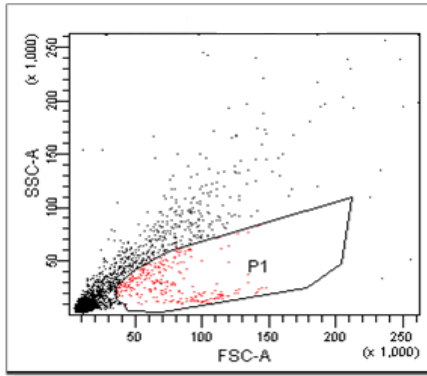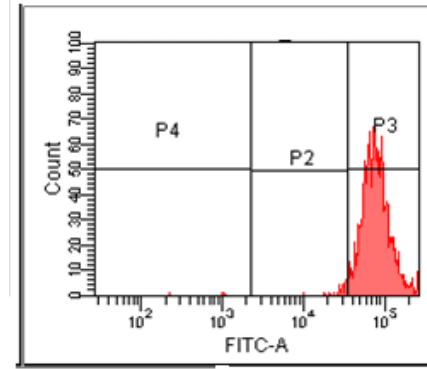

| Population | #Events | %Parent |
|------------|---------|---------|
| ■ P1       | 1,488   | 10.7    |
| ☒ P2       | 26      | 1.7     |
| ☒ P3       | 1,459   | 98.1    |
| ☒ P4       | 3       | 0.2     |

S2 (a): Negative control without peptide

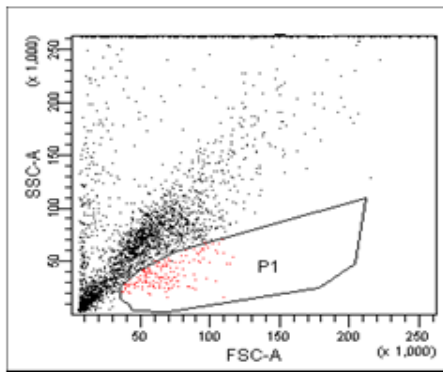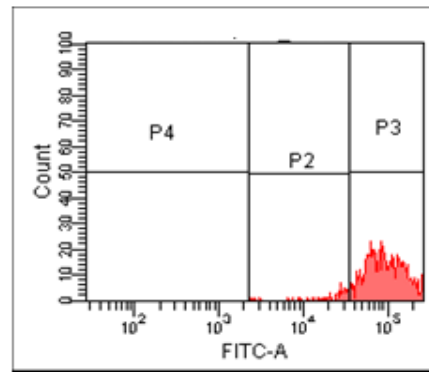

| Population | #Events | %Parent |
|------------|---------|---------|
| ■ P1       | 738     | 4.9     |
| ☒ P2       | 53      | 7.2     |
| ☒ P3       | 685     | 92.8    |
| ☒ P4       | 0       | 0.0     |

S2(b): 25µg/ml Peptide Concentration

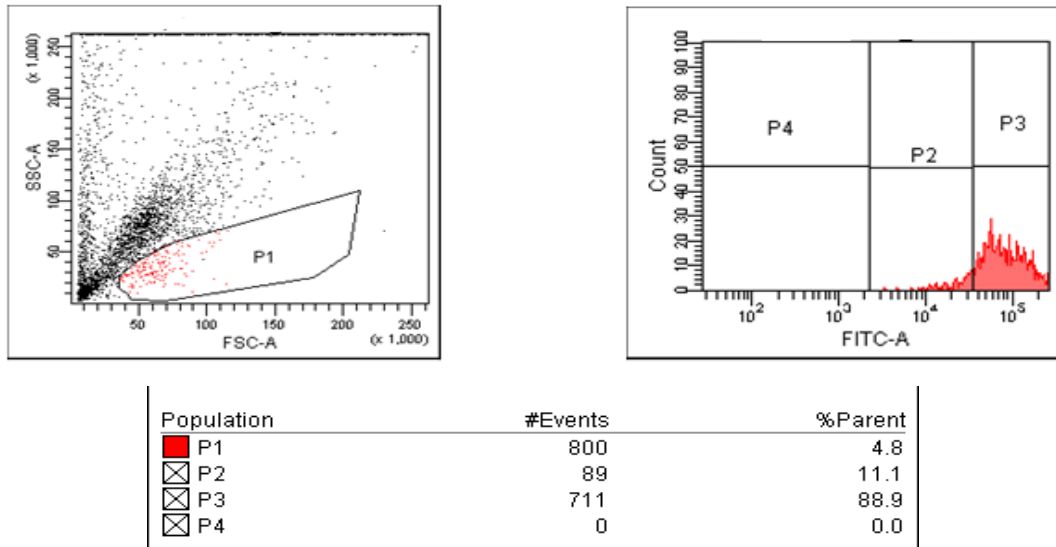

S2(c): 50µg/ml Peptide Concentration

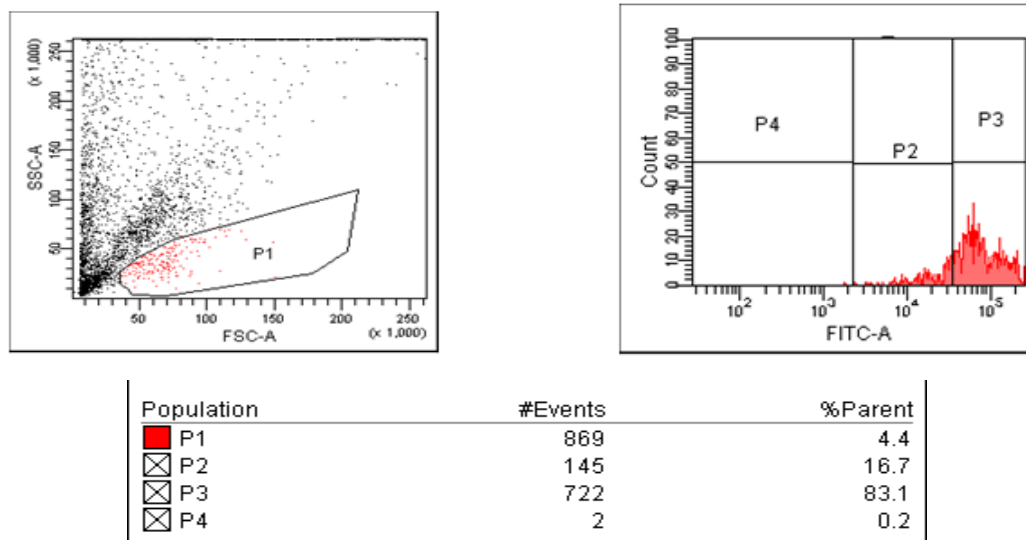

S2(d): 100µg/ml Peptide Concentration

Fig. S2. Flow cytometric results of proliferation assay carried out in one of *P. falciparum* exposed individuals. (a) Negative control without peptide (b) 25 µg/ml (Peptide Conc.) (c) 50 µg/ml (Peptide Conc.) (d) 100 µg/ml (Peptide Conc.) P3- Unstimulated cells. P2, P4- Stimulated cells.
